# Supplementary material for: Robust pyridylbenzoate metal–organic frameworks as sorbents for volatile solvents and gases
Source: Royal Society of Chemistry journal article supplement (doi:10.1039/d1ce01052b), 2021-01-01
Supplement: d1ce01052b1.pdf [file d1ce01052b1.pdf]

## Robust pyridylbenzoate metal-organic frameworks as sorbents for volatile solvents and gases

Christophe A. Ndamyabera, Nabanita Chatterjee, Clive L. Oliver, Susan A. Bourne\*

Centre for Supramolecular Chemistry Research, Department of Chemistry, University of Cape Town,  
Rondebosch 7701, South Africa

### Supplementary material

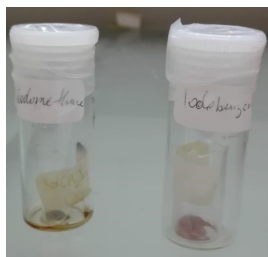

**Figure S1:** Sorption of VOCs (large vials) into the MOF adsorbents **1d** or **2d** in narrow vials. The examples shown here are **1d** and iodomethane (left) and **1d** and iodobenzene (right)

**Table S1:** Cell parameter of crystal from sorption of chlorinated solvents.

| Compound                                            | <b>1d</b> CH <sub>2</sub> Cl <sub>2</sub>                                       | <b>1d</b> CHCl <sub>3</sub>                                                        | <b>1d</b> ClBenz                                                   |
|-----------------------------------------------------|---------------------------------------------------------------------------------|------------------------------------------------------------------------------------|--------------------------------------------------------------------|
| Formula                                             | C <sub>25</sub> H <sub>18</sub> Cl <sub>2</sub> CoN <sub>2</sub> O <sub>4</sub> | C <sub>25</sub> H <sub>16.83</sub> Cl <sub>3</sub> CoN <sub>2</sub> O <sub>4</sub> | C <sub>30</sub> H <sub>21</sub> ClCo N <sub>2</sub> O <sub>4</sub> |
| Mass (g.mol <sup>-1</sup> )                         | 540.24                                                                          | 574.52                                                                             | 567.89                                                             |
| Crystal size (mm)                                   | 0.16 x 0.20 x 0.34                                                              | 0.11 x 0.21 x 0.33                                                                 | 0.10 x 0.13 x 0.20                                                 |
| Crystal system                                      | Monoclinic                                                                      | Monoclinic                                                                         | Monoclinic                                                         |
| Space group                                         | <i>P</i> 2 <sub>1</sub> / <i>c</i>                                              | <i>P</i> 2 <sub>1</sub> / <i>c</i>                                                 | <i>P</i> 2 <sub>1</sub> / <i>c</i>                                 |
| a/(Å)                                               | 10.5973(11)                                                                     | 10.0048(16)                                                                        | 10.2944(16)                                                        |
| b/(Å)                                               | 15.3082(15)                                                                     | 16.371(3)                                                                          | 16.272(3)                                                          |
| c/(Å)                                               | 14.8848(15)                                                                     | 15.036(3)                                                                          | 15.248(3)                                                          |
| β/(°)                                               | 99.964(2)                                                                       | 97.402(3)                                                                          | 95.232(4)                                                          |
| V/(Å <sup>3</sup> )                                 | 2378.3(4)                                                                       | 2442.3(7)                                                                          | 2543.6(7)                                                          |
| T/(K)                                               | 100                                                                             | 173                                                                                | 173                                                                |
| D (g·cm <sup>-3</sup> )                             | 1.509                                                                           | 1.562                                                                              | 1.483                                                              |
| μ(Mo-Kα) (mm <sup>-1</sup> )                        | 0.981                                                                           | 1.066                                                                              | 0.820                                                              |
| F(000)                                              | 1100                                                                            | 1163                                                                               | 1164                                                               |
| Range scanned, θ (°)                                | 1.923-28.14                                                                     | 1.847-28.31                                                                        | 1.834-28.26                                                        |
| No. reflns collected                                | 42669                                                                           | 42591                                                                              | 51772                                                              |
| No. unique reflns                                   | 5821                                                                            | 6062                                                                               | 6296                                                               |
| No. reflns with I ≥ 2σ(I)                           | 4338                                                                            | 4504                                                                               | 4493                                                               |
| Parameters/restraints                               | 335/0                                                                           | 326/0                                                                              | 343/0                                                              |
| Goodness of fit, S                                  | 1.015                                                                           | 1.019                                                                              | 1.038                                                              |
| Final R indices (I ≥ 2σ(I))                         | 0.0696                                                                          | 0.0741                                                                             | 0.0550                                                             |
| Final wR2 (all data)                                | 0.1092                                                                          | 0.1293                                                                             | 0.1386                                                             |
| Min,max e <sup>-</sup> density/(e Å <sup>-3</sup> ) | 0.646, -0.699                                                                   | 0.674, -0.946                                                                      | 1.282, -1.117                                                      |

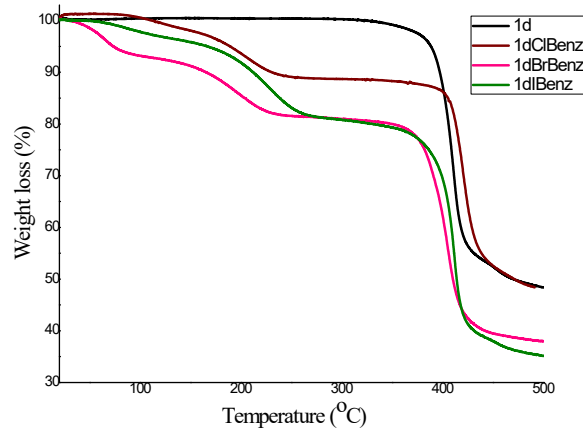

(a)

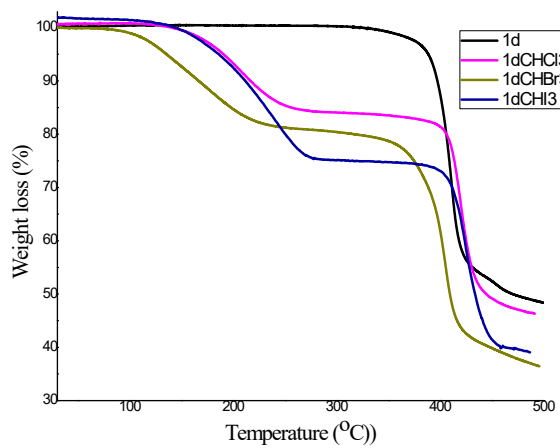

(b)

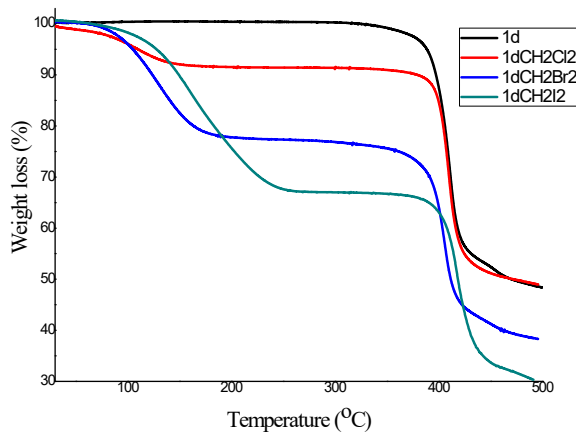

(c)

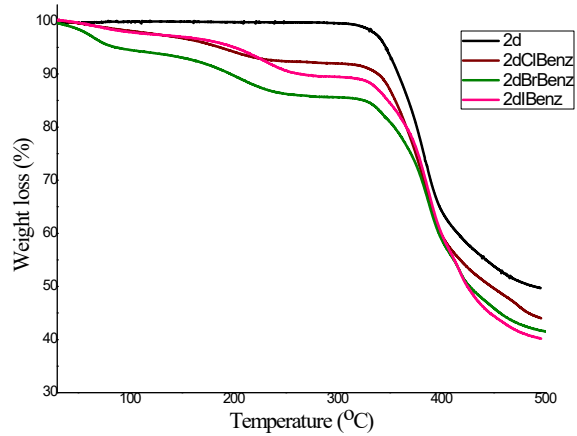

(d)

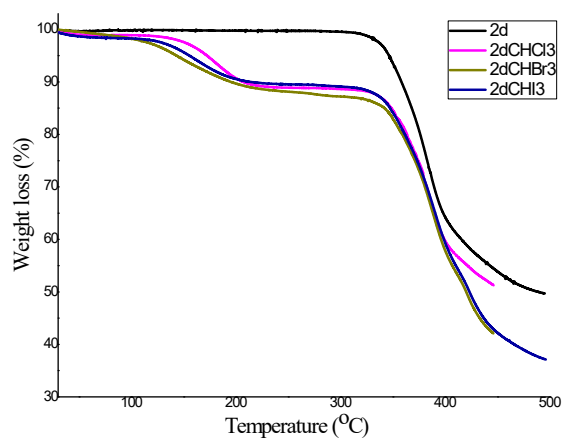

(e)

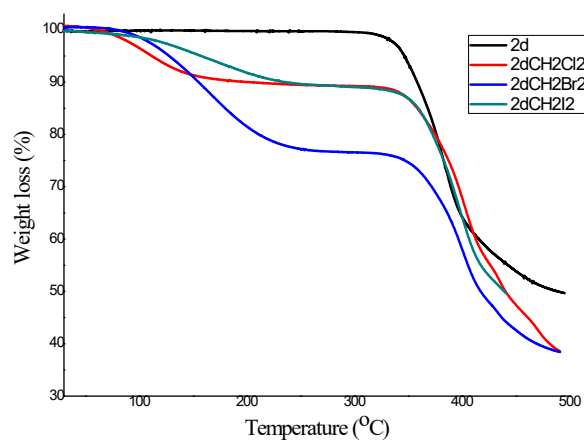

(f)

**Figure S2.** TGA showing sorption capacities for halogenated solvents for (a)-(c) **1d** and (d)-(f) **2d**

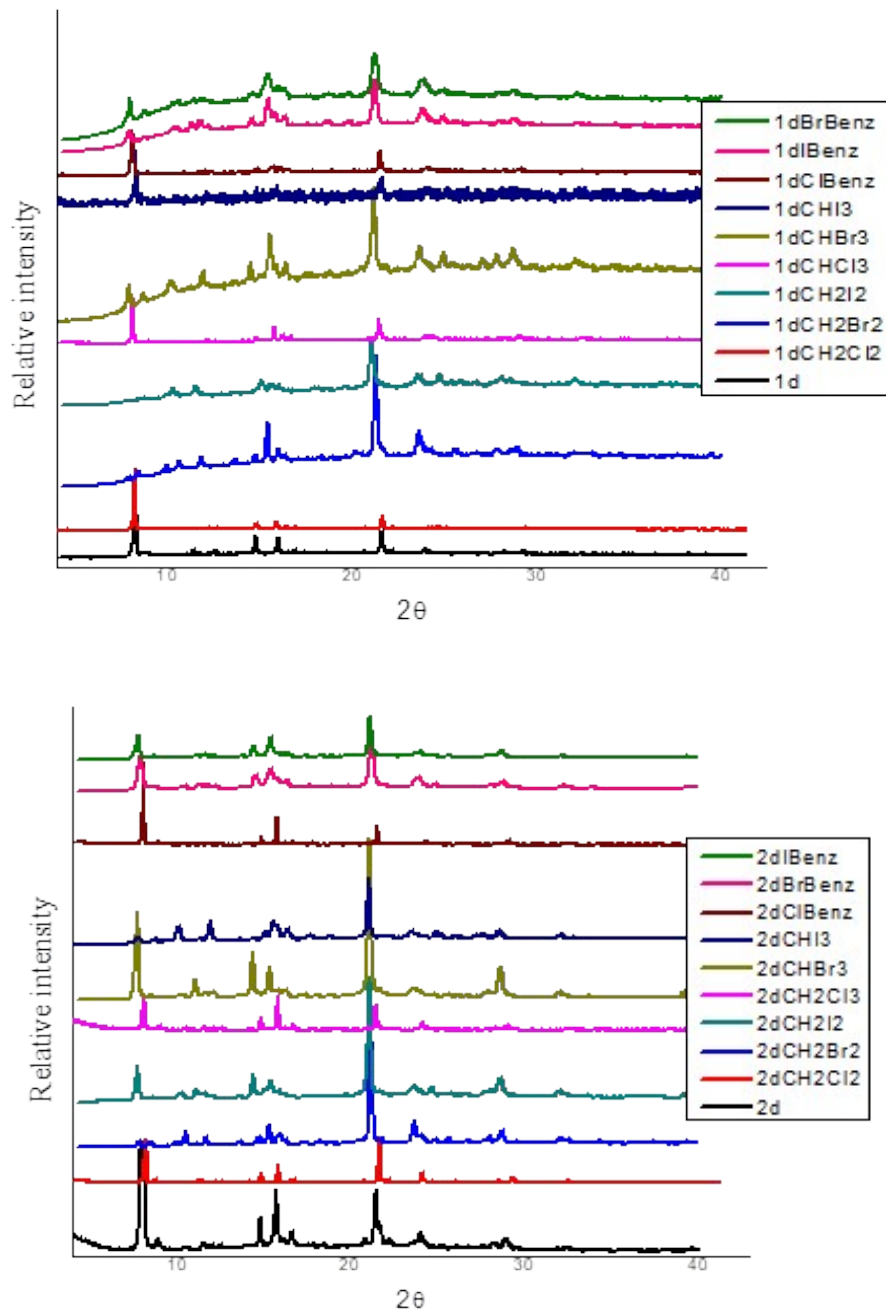

**Figure S3.** PXRD of sorption products of halogenated solvents for (top) **1d** and (bottom) **2d**

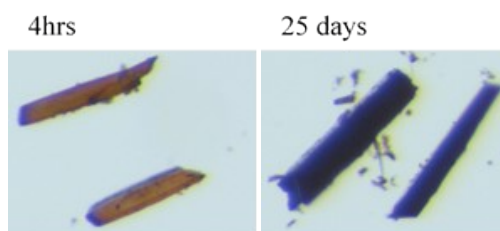

**Figure S4.** Colour changes are evident on adsorption of iodine to form **1dI<sub>2</sub>**

**Table S5.** Void volumes in crystal structures

|                                       | Void volume per unit cell (Å <sup>3</sup> ) |
|---------------------------------------|---------------------------------------------|
| <b>1dCH<sub>2</sub>Cl<sub>2</sub></b> | 457                                         |
| <b>1dCHCl<sub>3</sub></b>             | 621                                         |
| <b>1dClBenz</b>                       | 730                                         |
| <b>1dI<sub>2</sub></b>                | 644                                         |
| <b>1d</b>                             | 481                                         |
| <b>1dI<sub>2</sub>d</b>               | 445                                         |

**Table S6.** Unit cell parameters as crystals are taken through a sequence of drying and solvent sorption.\*

| Compound                 | <b>1d</b>               | <b>1dI<sub>2</sub></b>  | <b>1dI<sub>2</sub>d</b> | <b>1dI<sub>2</sub>**</b> | <b>1dI<sub>2</sub>d**</b> | <b>1dI<sub>2</sub>dDMF**</b> |
|--------------------------|-------------------------|-------------------------|-------------------------|--------------------------|---------------------------|------------------------------|
| <b>Crystal system</b>    | Monoclinic              | Monoclinic              | Monoclinic              | Monoclinic               | Monoclinic                | Monoclinic                   |
| <b>Space group</b>       | <i>P2<sub>1</sub>/c</i> | <i>P2<sub>1</sub>/c</i> | <i>P2<sub>1</sub>/c</i> | <i>P2<sub>1</sub>/c</i>  | <i>P2<sub>1</sub>/c</i>   | <i>P2<sub>1</sub>/c</i>      |
| <b>a/(Å)</b>             | 10.3931(14)             | 10.114(3)               | 10.4014(11)             | 10.21                    | 10.14                     | 9.49                         |
| <b>b/(Å)</b>             | 16.027(2)               | 16.501(4)               | 16.1330(17)             | 16.89                    | 16.07                     | 17.84                        |
| <b>c/(Å)</b>             | 14.996(2)               | 14.700(4)               | 14.6878(15)             | 14.73                    | 14.38                     | 14.63                        |
| <b>β/(°)</b>             | 98.243(2)               | 97.159(4)               | 98.482(2)               | 96.9                     | 97.7                      | 92.12                        |
| <b>V/(Å<sup>3</sup>)</b> | 2472.2(6)               | 2434.3(11)              | 2437.7(4)               | 2524                     | 2323                      | 2475                         |

\* **1dI<sub>2</sub>** prepared on exposing **1d** on iodine in 25 days, was submerged into methanol in vial for four days and methanol was refreshed two times to form **1dI<sub>2</sub>d**. The latter was again submerged in DMF in vial to form **1dI<sub>2</sub>d\_DMF**.

\*\* Only a cell check done, hence the data is not as precise as for those crystals where full refinement was carried out.

**Table S7.** Properties of halogenated VOCs used in sorption experiments<sup>a</sup>

| Guest molecules                     | Boiling point (°C) | Density (g cm <sup>-3</sup> ) | Solvent molecular volume (Å <sup>3</sup> ) <sup>b</sup> |
|-------------------------------------|--------------------|-------------------------------|---------------------------------------------------------|
| <b>CH<sub>2</sub>Cl<sub>2</sub></b> | 39.6               | 1.33                          | 106                                                     |
| <b>CH<sub>2</sub>Br<sub>2</sub></b> | 97.0               | 2.5                           | 115                                                     |
| <b>CH<sub>2</sub>I<sub>2</sub></b>  | 181                | 3.32                          | 134                                                     |
| <b>CHCl<sub>3</sub></b>             | 61.2               | 1.49                          | 133                                                     |
| <b>CHBr<sub>3</sub></b>             | 149.1              | 2.89                          | 145                                                     |
| <b>CHI<sub>3</sub></b>              | 121                | 4.01                          | 163                                                     |
| <b>Chlorobenzene</b>                | 132                | 1.11                          | 168                                                     |
| <b>Bromobenzene</b>                 | 156                | 1.5                           | 173                                                     |
| <b>Iodobenzene</b>                  | 188                | 1.83                          | 185                                                     |
| <b>Iodine</b>                       |                    | 4.93                          | 85                                                      |

<sup>a</sup> Density and boiling point taken from pubchem.ncbi.nlm.nih.gov

$$= \frac{\text{Molecular Weight}}{N_A \times \text{Density}}$$

<sup>b</sup> Molecular volume of solvent

**Table S8:** Selected torsion angles.

| Compound         | 1d        | 1dI <sub>2</sub> | 1dI <sub>2</sub> d | 1dCH <sub>2</sub> Cl <sub>2</sub> | 1dCHCl <sub>3</sub> | 1dClBenz  |
|------------------|-----------|------------------|--------------------|-----------------------------------|---------------------|-----------|
| 34pba:           |           |                  |                    |                                   |                     |           |
| C3A-C4A-C8A-C12A | 157.3(4)  | 139.5(4)         | 153.8(3)           | 156.5(3)                          | 135.0(3)            | -138.8(3) |
| C3A-C4A-C8A-C121 | 145.6(4)  | 179.6(4)         | -153.8(3)          |                                   |                     |           |
| O1A-C1A-C2A-C7A  | -178.8(4) |                  | 178.7(3)           | 174.8(3)                          | -179.1(2)           | 177.8(3)  |
| 44pba:           |           |                  |                    |                                   |                     |           |
| C4B-C5B-C8B-C12B | 154.47(4) | 163.0(4)         | -166.6(3)          | -159.0(3)                         | 151.7(3)            | 157.0(3)  |
| C4B-C5B-C8B-C121 | -172.1(4) |                  | 160.7(3)           |                                   |                     |           |
| O1B-C1B-C2B-C7B  | -157.2(4) | -179.4(4)        | 154.4(3)           | 162.2(3)                          | -171.5(3)           | -177.9(3) |
| O1B-C1B-C2B-C71  | 155.1(4)  |                  | -161.3(3)          |                                   |                     |           |

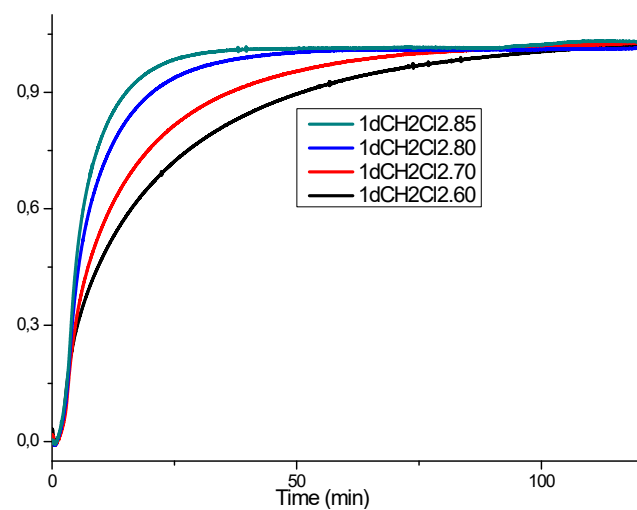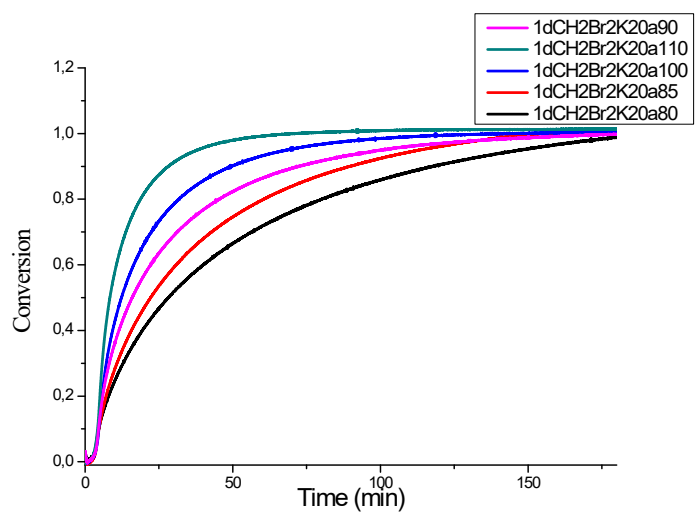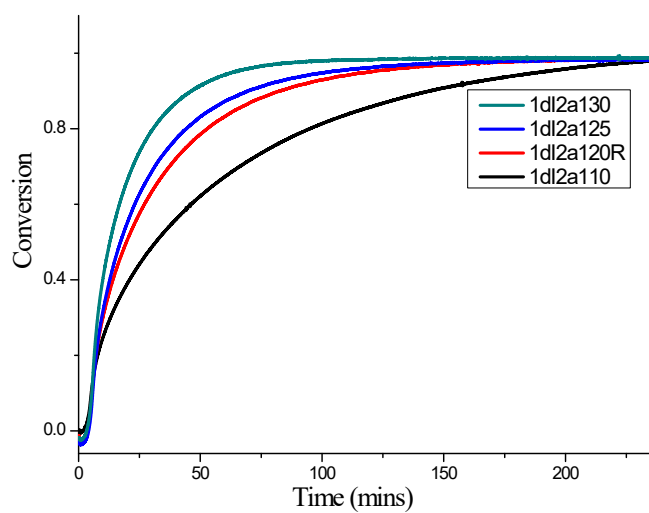

**Figure S5.** Isothermal desorption curves

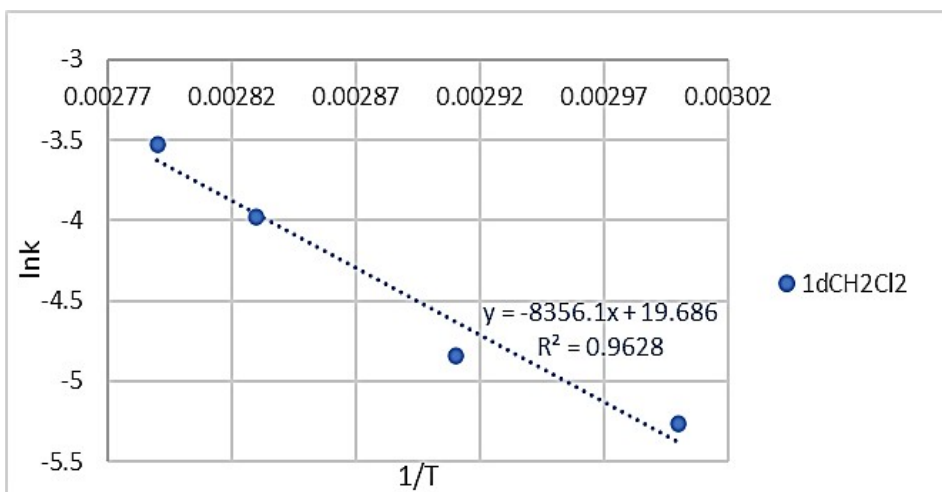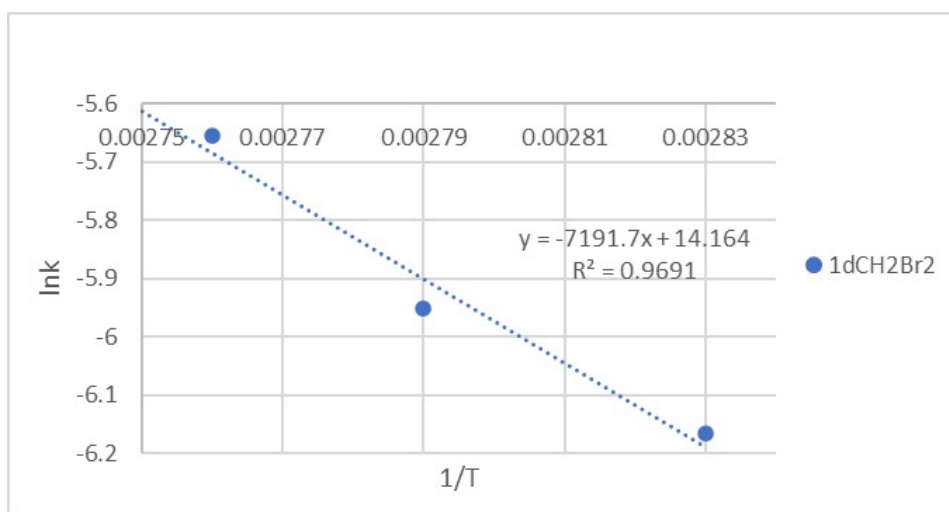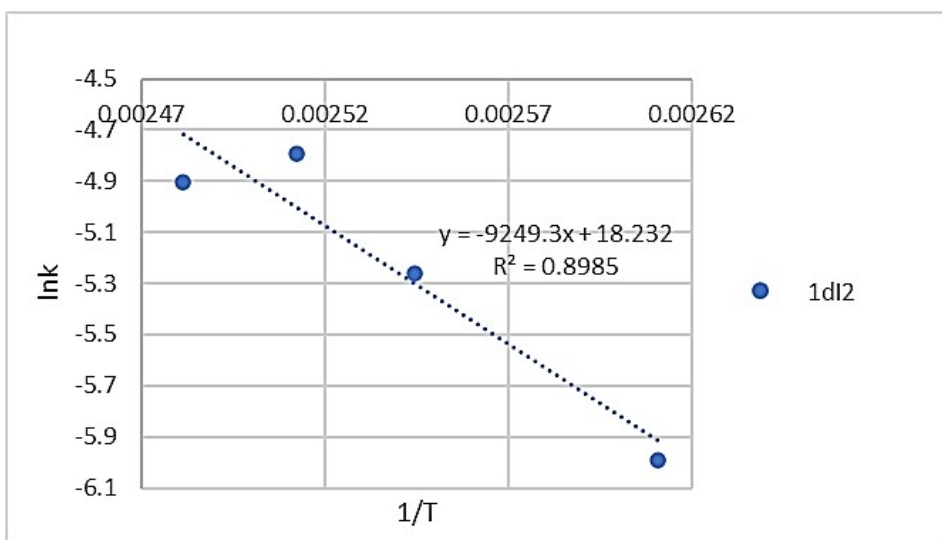

**Figure S6:** Arrhenius plots for desorption in CH<sub>2</sub>Cl<sub>2</sub>, CH<sub>2</sub>Br<sub>2</sub>, and I<sub>2</sub>
